# Supplementary material
Source: PubMed Central journal article supplement (PMC5669636)

## Supplemental Figure 1: Morphology and Phenotype of WT and CRF<sub>1</sub><sup>-/-</sup> BMMCs.

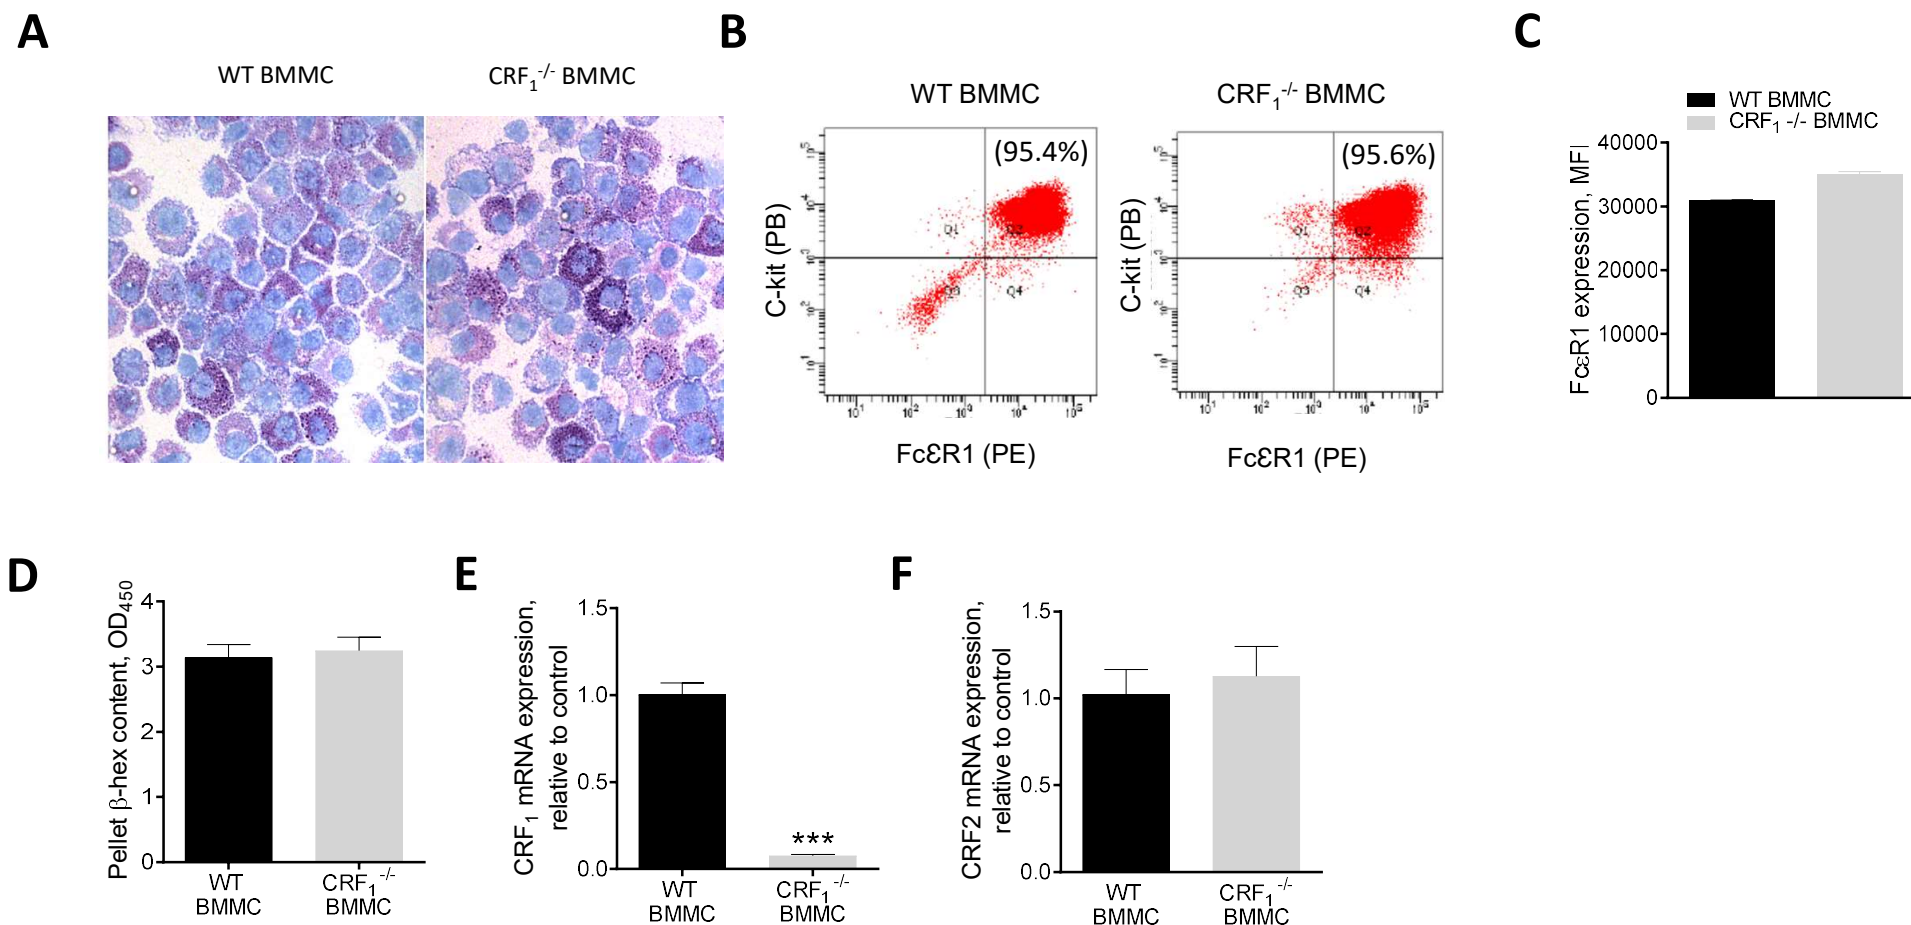

Supplement: supp_jlb.2HI0317-088RR_Supplemental_Figure1.pdf [file supp_jlb.2HI0317-088RR_Supplemental_Figure1.pdf]
